# Supplementary material for: Tumor-targeted delivery of siRNA to silence Sox2 gene expression enhances therapeutic response in hepatocellular carcinoma
Source: PubMed Central journal article supplement — Bioact Mater. 2020 Nov 10;6(5):1330–40. doi: 10.1016/j.bioactmat.2020.10.019 (PMC7658325; doi:10.1016/j.bioactmat.2020.10.019), 2020-11-10
Supplement: mmc1.pdf [file mmc1.pdf]

## Supplementary materials for

### **“Tumor-targeted delivery of siRNA to silence Sox2 gene expression enhances therapeutic response in hepatocellular carcinoma”**

Yu Xia<sup>a,\*</sup>, Guoyi Tang<sup>c</sup>, Yi Chen<sup>b</sup>, Changbing Wang<sup>b</sup>, Min Guo<sup>b</sup>, Tiantian Xu<sup>b</sup>, Mingqi Zhao<sup>b</sup>, Yongjian Zhou<sup>a,\*</sup>

<sup>a</sup> Department of Gastroenterology and Hepatology, Guangzhou Digestive Disease Center, Guangzhou First People's Hospital, School of Medicine, South China University of Technology, Guangzhou, 510180, China

<sup>b</sup> Central Laboratory, Guangzhou Institute of Pediatrics, Guangzhou Women and Children's Medical Center, Guangzhou Medical University, Guangzhou, 510120, China

<sup>c</sup> Department of Obstetrics Gynecology, Guangzhou Women and Children's Medical Center, Guangzhou Medical University, Guangzhou, 510120, China

\* Corresponding authors. Department of Gastroenterology and Hepatology, Guangzhou Digestive Disease Center, Guangzhou First People's Hospital, School of Medicine, South China University of Technology, Guangzhou, 510180, China

*E-mail addresses:* [eyyuxia@scut.edu.cn](mailto:eyyuxia@scut.edu.cn) (Y. Xia), [eyzhouyongjian@scut.edu.cn](mailto:eyzhouyongjian@scut.edu.cn) (Y. Zhou).

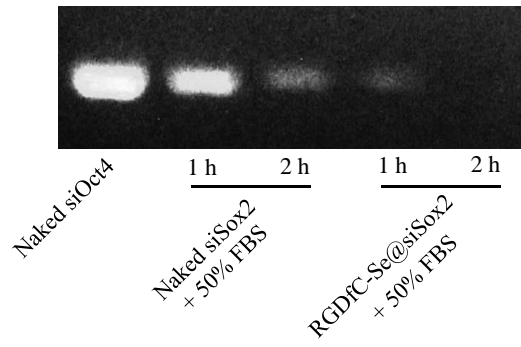

**Fig. S1.** Agarose gel electrophoretogram showing siSox2 protection by RGDfC-Se for 1 and 2 h incubation compared to siSox2 exposed to 50% serum. Naked siSox2 not exposed to serum was used as control.

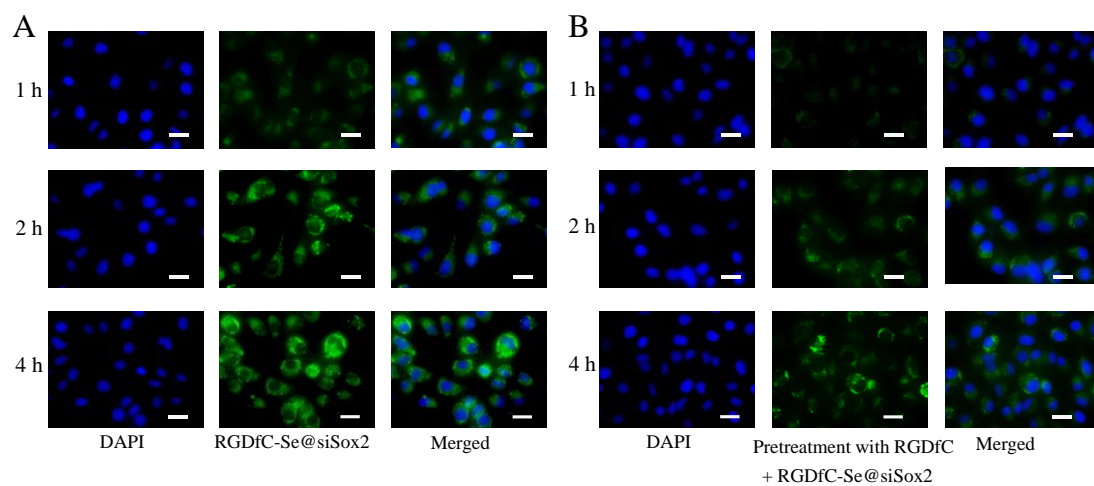

**Fig. S2.** (A) The uptake of RGDfC-Se@siSox2 in HepG2 cells was observed under a fluorescence microscope. (B) The uptake of RGDfC-Se@siSox2 in HepG2 cells pretreated with RGDfC were observed under a fluorescence microscope. Scale bars = 20  $\mu$ m.
